# Supplementary material for: Mechanical Properties and Synergistic Interfacial Interactions of ZnO Nanorod-Reinforced Polyamide–Imide Composites
Source: MDPI journal article supplement (doi:10.3390/polym15061522), 2023-03-19
Supplement: s1 [file s1]

## Supporting Information

### Dynamic Mechanical Properties and Synergistic Interfacial Interactions of ZnO Nanorods Reinforced Polyamide Composites

Dallas Kesler,<sup>1</sup> Bhanuka P. Ariyawansa,<sup>2</sup> and Hemali Rathnayake<sup>1,\*</sup>

**Table S1.** Mechanical properties of ZnO nanorods-reinforced PAI composites.

| % Weight of ZnO nanorods (%wt) | Average maximum depth $\pm$ SD (nm) | Stiffness $\pm$ SD ( $\mu$ N/nm) | Reduced Elastic Modulus $\pm$ SD (GPa) | Hardness $\pm$ SD (GPa) |
|--------------------------------|-------------------------------------|----------------------------------|----------------------------------------|-------------------------|
| None                           | 400 $\pm$ 8.50                      | 3.25 $\pm$ 0.02                  | 4.64 $\pm$ 0.03                        | 0.384 $\pm$ 0.001       |
| 2.5                            | 296 $\pm$ 4.00                      | 3.56 $\pm$ 0.05                  | 5.64 $\pm$ 0.09                        | 0.473 $\pm$ 0.006       |
| 5.0                            | 266 $\pm$ 6.00                      | 3.69 $\pm$ 0.06                  | 6.14 $\pm$ 0.08                        | 0.522 $\pm$ 0.010       |
| 9.0                            | 256 $\pm$ 12.8                      | 3.88 $\pm$ 0.10                  | 6.47 $\pm$ 0.20                        | 0.525 $\pm$ 0.020       |
| 16.5                           | 238 $\pm$ 14.3                      | 3.88 $\pm$ 0.08                  | 6.79 $\pm$ 0.20                        | 0.580 $\pm$ 0.040       |

\*R2 for stiffness, reduced elastic modulus, and hardness are at the level of 93%, 97%, and 98% confidence level, respectively.

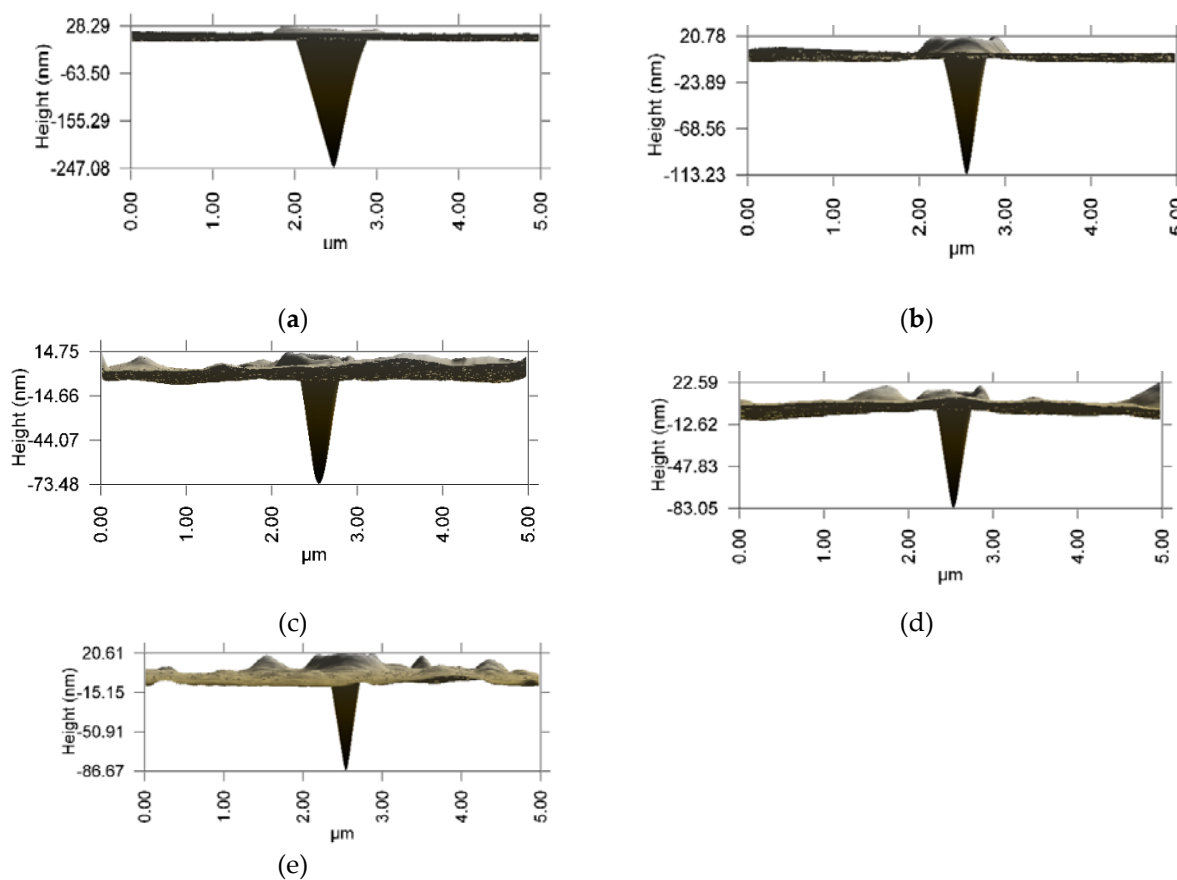

**Figure S1:** Profile AMF images of composites showing surface roughness after post indentation – (a) Neat PMR film, and composite thin films with: (b) 2.5 wt %, (c) 5 wt %, (d) 9.0 wt %, and (e) 16.5 wt% of ZnO nanorods.

**Table S2:** Approximate surface roughness of each composite measured from profile AFM

| ZnO Concentration (wt %) | Approximate Surface Roughness (nm) |
|--------------------------|------------------------------------|
| 0                        | 0                                  |
| 2.5                      | 0                                  |
| 5.0                      | 4                                  |
| 9.0                      | 13                                 |
| 16.5                     | 14                                 |

**Table S3:** Elastic wave speed of PAI/ZnO composites

| Wt% of ZnO nanorods | Speed of Elastic Wave (km/s) $\pm$ SD | Percent change from neat polymer to composites |
|---------------------|---------------------------------------|------------------------------------------------|
| 0                   | 3.21 $\pm$ 0.01                       | 0.00                                           |
| 2.5                 | 3.48 $\pm$ 0.03                       | 8.45                                           |
| 5.0                 | 3.57 $\pm$ 0.02                       | 11.4                                           |
| 9.0                 | 3.57 $\pm$ 0.05                       | 11.3                                           |
| 16.5                | 3.50 $\pm$ 0.06                       | 9.06                                           |

**Table S4:** The quantified %change in depth of PAI/ZnO nanorods composites with respect to the time from maximum load to maximum depth

| ZnO wt % in composite | Percent change in depth | Time (s) from maximum load to maximum depth |
|-----------------------|-------------------------|---------------------------------------------|
| 0                     | 2.2                     | 0.51                                        |
| 2.44                  | 1.92                    | 0.41                                        |
| 4.76                  | 1.08                    | 0.30                                        |
| 9.09                  | 1.27                    | 0.31                                        |
| 16.67                 | 0.73                    | 0.22                                        |
